# Supplementary material
Source: publisher figshare collection journal article supplement (https://rs.figshare.com/ndownloader/files/12404468)
Supplement: Supplementary file 1 [file 12404468]

## Sheet: SM_Dataset
Table S1. Scaled morphometric measures for each specimen included in the full dataset.
Catalog No.	Sub-NALMA	Order	Suborder	Family	Species	Element1	Scaled Total Crest Length (mm)	Mean Trigonid Cusp Angle (Radians)	Mean Talonid Cusp Angle (Radians)	Scaled Talonid Area (mm2)	Scaled Talonid Basin Depth (mm)	Scaled Postvallid Wall Height (mm)	Scaled Mean Trigonid Cusp Height (mm)	Scaled Mean Talonid Cusp Height (mm)
UM 65472	Cf2-3	"Sundatheria"		Plagiomenidae	Plagiomene accola	m1	4.23018	1.39876	1.56219	0.412825	0.245215	0.245404	0.807354	0.721008
UM 109708	Cf2-3	"Sundatheria"		Plagiomenidae	Worlandia inusitata	m2	4.14514	1.12933	1.62474	0.438643	0.132514	0.456428	0.739298	0.630335
UM 109777	Cf2-3	"Sundatheria"		Plagiomenidae	Worlandia inusitata	m2	3.89522	1.47604	1.96681	0.452464	0.105409	0.546236	0.686922	0.597785
UM 109797	Cf2-3	"Sundatheria"		Plagiomenidae	Worlandia inusitata	m2	4.36915	1.16559	1.46498	0.521664	0.0829935	0.37936	0.720513	0.78709
UM 69601	Cf2-3	"Sundatheria"		Plagiomenidae	Worlandia inusitata	m2	4.21258	1.33556	1.68499	0.463359	0.172922	0.373958	0.680754	0.712456
UM 69602	Cf2-3	"Sundatheria"		Plagiomenidae	Worlandia inusitata	m2	4.50318	1.21674	1.24003	0.464847	0.0917197	0.333432	0.699812	0.765274
UM 71042	Cf2-3	"Sundatheria"		Plagiomenidae	Worlandia inusitata	m2	4.00799	1.28105	1.60639	0.402153	0.0844594	0.41588	0.726291	0.689175
UM 71012	Cf2-3	Apatotheria		Apatemyidae	Labidolemur kayi	m2	3.50099	1.21987	2.20716	0.309282	0.226864	0.298677	0.980834	0.516008
UM 71481	Cf2-3	Apatotheria		Apatemyidae	Labidolemur kayi	m1	3.0967	1.43029	2.29489	0.45377	0.155052	0.456102	0.836324	0.574348
UM 73500	Cf2-3	Apatotheria		Apatemyidae	Labidolemur kayi	m1	3.4874	1.08524	2.24567	0.378648	0.179094	0.274195	0.974038	0.600866
UM 73501	Cf2-3	Apatotheria		Apatemyidae	Labidolemur kayi	m2	3.55905	1.2367	2.42901	0.30497	0.14026	0.476752	0.864903	0.438864
UM 65001	Cf2-3	Didelphimorphia		Peradectidae	Peradectes chesteri	m2	3.88031	0.685738	1.73208	0.363554	0.0730144	0.861323	1.19273	0.58176
UM 109746	Cf2-3	Didelphimorphia		Peradectidae	Peradectes protinnominatus	mX	3.49822	0.835689	1.96775	0.336793	0.134239	0.612868	1.10806	0.523336
UM 73606	Cf2-3	Didelphimorphia		Peradectidae	Peradectes protinnominatus	mX	3.13993	1.62955	2.47788	0.26395	0.210623	0.72101	1.13786	0.591038
UM 82390	Cf2-3	Didelphimorphia		Peradectidae	Peradectes protinnominatus	m2	3.45894	0.841105	1.51361	0.30109	0.228315	0.462456	1.09699	0.603793
UM 82680	Cf2-3	Didelphimorphia		Peradectidae	Peradectes protinnominatus	m2	3.73618	0.954539	1.91757	0.338246	0.182844	0.389502	1.20138	0.685256
UM 82674	Cf2-3	Didelphodonta		Palaeoryctidae	Palaeoryctes punctatus	m2	3.0833	1.37243	2.16821	0.240159	0.308229	0.352921	1.36996	0.634971
UM 71232	Cf2-3	Leptictida		Leptictidae	Diacodon minutus	m1	3.05859	1.50211	2.18815	0.32109	0.242035	0.529623	0.840617	0.675674
UM 109739	Cf2-3	Lipotyphla	Erinaceomorpha		Diacocherus minutus	m2	3.21009	1.67468	1.75139	0.347068	0.192089	0.538469	0.799592	0.591799
UM 71685	Cf2-3	Lipotyphla	Erinaceomorpha		Diacocherus minutus	m1	2.94883	1.77352	1.97596	0.343103	0.24289	0.480259	0.763997	0.570718
UM 87803	Cf2-3	Lipotyphla	Erinaceomorpha		Diacocherus sp.	m2	3.3595	1.54789	1.57212	0.334475	0.236971	0.598724	0.9044	0.664539
UM 71660	Cf2-3	Lipotyphla	Erinaceomorpha		Leipsanolestes siegfriedti	m2	2.86809	2.0278	2.53742	0.343456	0.155872	0.344194	0.734589	0.584637
UM 77572	Cf2-3	Lipotyphla	Erinaceomorpha		Leipsanolestes siegfriedti	m2	2.8539	1.67036	1.80532	0.28335	0.198302	0.392606	0.738679	0.59352
UM 68866	Cf2-3	Lipotyphla	Soricomorpha	Nyctitheriidae	Leptacodon rosei	mX	3.38832	1.45904	1.94947	0.383337	0.169967	0.591783	0.916256	0.628308
UM 71661	Cf2-3	Lipotyphla	Soricomorpha	Nyctitheriidae	Leptacodon rosei	m2	3.14195	1.94477	2.34994	0.375906	0.160112	0.490926	0.704371	0.498243
UM 82389	Cf2-3	Lipotyphla	Soricomorpha	Nyctitheriidae	Leptacodon rosei	m1	2.89583	1.96903	2.23721	0.34842	0.120118	0.60776	0.830836	0.461624
UM 99032	Cf2-3	Lipotyphla	Soricomorpha	Nyctitheriidae	Leptacodon sp.	m2	3.79866	1.48504	1.70452	0.394615	0.211407	0.653446	0.954761	0.708531
UM 92846	Cf2-3	Lipotyphla	Soricomorpha	Nyctitheriidae	Nyctitherium sp.	m1	3.04616	1.75865	2.03738	0.303341	0.141124	0.758999	1.017	0.614401
UM 71686	Cf2-3	Lipotyphla	Soricomorpha	Nyctitheriidae	Plagioctenodon krausae	m1	3.27738	1.53463	1.93407	0.343312	0.142598	0.606325	0.816025	0.534948
UM 71689	Cf2-3	Lipotyphla	Soricomorpha	Nyctitheriidae	Plagioctenodon krausae	m1	3.65105	1.50243	1.87753	0.384837	0.214565	0.757931	1.00299	0.588483
UM 80257	Cf2-3	Lipotyphla	Soricomorpha	Nyctitheriidae	Wyonycteris chalix	m2	2.95501	1.70202	1.82768	0.306874	0.102089	0.416888	0.718008	0.582525
UM 68288	Cf2-3	Lipotyphla	Soricomorpha	Nyctitheriidae	Wyonycteris galensis	m2	2.96866	1.5277	2.00921	0.340502	0.0777045	0.471071	0.66088	0.534704
UM 109908	Cf2-3	Primates	Plesiadapiformes	Carpolestidae	Carpolestes nigridens	m2	3.75465	2.12562	2.28928	0.41975	0.193342	0.668264	0.934304	0.616355
UM 80562	Cf2-3	Primates	Plesiadapiformes	Carpolestidae	Carpolestes nigridens	m2	3.79494	1.5291	1.82697	0.402956	0.243931	0.64252	0.692704	0.613492
UM 83021	Cf2-3	Primates	Plesiadapiformes	Carpolestidae	Carpolestes nigridens	m2	3.914	1.25088	2.1589	0.464909	0.24758	0.794815	0.864148	0.70256
UM 86544	Cf2-3	Primates	Plesiadapiformes	Carpolestidae	Carpolestes nigridens	m2	3.33838	2.33397	2.54772	0.313679	0.218739	0.231004	0.781799	0.570244
UM 71004	Cf2-3	Primates	Plesiadapiformes	Carpolestidae	Carpolestes simpsoni	m2	3.60815	1.77277	2.0911	0.339656	0.137968	0.431282	0.785698	0.880892
UM 82615	Cf2-3	Primates	Plesiadapiformes	Carpolestidae	Carpolestes simpsoni	m2	3.77998	1.77229	1.74328	0.357453	0.247433	0.639923	0.747931	0.65496
UM 82672	Cf2-3	Primates	Plesiadapiformes	Carpolestidae	Carpolestes simpsoni	m2	3.81345	1.4071	1.98383	0.423465	0.228056	0.354774	0.832898	0.640994
UM 82673	Cf2-3	Primates	Plesiadapiformes	Carpolestidae	Carpolestes simpsoni	m2	3.67336	1.96161	2.28279	0.402095	0.179569	0.372038	0.936609	0.64543
UM 98199	Cf2-3	Primates	Plesiadapiformes	Carpolestidae	Carpolestes simpsoni	m2	4.69239	2.12286	1.86336	0.476263	0.293965	0.665021	0.833043	0.69393
UM 83015	Cf2-3	Primates	Plesiadapiformes	Microsyopidae	Arctodontomys simplicidens	mX	3.58789	1.75148	2.34747	0.434024	0.209469	0.429088	0.822446	0.628615
UM 83019	Cf2-3	Primates	Plesiadapiformes	Microsyopidae	Arctodontomys simplicidens	m1	3.83617	1.26406	1.89958	0.389977	0.24437	0.314385	0.859327	0.613563
UM 88182	Cf2-3	Primates	Plesiadapiformes	Paromomyidae	Ignacius clarkforkensis	m1	4.04278	1.50127	1.98133	0.495857	0.156484	0.393825	0.705951	0.602795
UM 69877	Cf2-3	Primates	Plesiadapiformes	Paromomyidae	Ignacius graybullianus	m1	4.26964	1.63226	2.18836	0.553604	0.152891	0.262451	0.720661	0.610762
UM 115600	Cf2-3	Primates	Plesiadapiformes	Paromomyidae	Ignacius sp.	m2	4.66033	1.85718	2.38842	0.638068	0.158453	0.288998	0.583555	0.406003
UM 66908	Cf2-3	Primates	Plesiadapiformes	Paromomyidae	Phenacolemur pagei	m2	4.19265	1.79216	1.76005	0.487902	0.18411	0.39372	0.706273	0.606467
UM 69269	Cf2-3	Primates	Plesiadapiformes	Paromomyidae	Phenacolemur pagei	m2	4.24757	1.78334	2.22816	0.472186	0.220017	0.67122	0.708123	0.60062
UM 71023	Cf2-3	Primates	Plesiadapiformes	Paromomyidae	Phenacolemur pagei	m1	4.30279	1.30312	1.51665	0.438558	0.246939	0.375604	0.85529	0.724685
UM 71026	Cf2-3	Primates	Plesiadapiformes	Paromomyidae	Phenacolemur pagei	m2	4.71706	1.40148	1.89667	0.568388	0.263604	0.312596	0.87648	0.651809
UM 73402	Cf2-3	Primates	Plesiadapiformes	Paromomyidae	Phenacolemur pagei	m1	4.18462	2.03911	2.30771	0.386171	0.203734	0.243862	0.837876	0.650369
UM 81428	Cf2-3	Primates	Plesiadapiformes	Paromomyidae	Phenacolemur pagei	m2	4.06074	1.7967	2.13676	0.477381	0.20541	0.301979	0.681748	0.547517
UM 109684	Cf2-3	Primates	Plesiadapiformes	Paromomyidae	Phenacolemur praecox	m1	4.4549	1.47946	1.92106	0.447792	0.259748	0.577556	0.921977	0.660286
UM 109688	Cf2-3	Primates	Plesiadapiformes	Paromomyidae	Phenacolemur praecox	m2	3.96267	1.84611	2.28075	0.452888	0.169293	0.303456	0.839639	0.57525
UM 109682	Cf2-3	Primates	Plesiadapiformes	Plesiadapidae	Plesiadapis cookei	m1	3.60681	2.13603	2.19845	0.332141	0.161035	0.266583	0.822794	0.606624
UM 63289	Cf2-3	Primates	Plesiadapiformes	Plesiadapidae	Plesiadapis cookei	m2	3.85421	1.98247	1.63857	0.393604	0.15112	0.178544	0.855552	0.669092
UM 69175	Cf2-3	Primates	Plesiadapiformes	Plesiadapidae	Plesiadapis cookei	m2	3.74793	1.78789	1.90074	0.369525	0.167099	0.165319	0.750704	0.533106
UM 69313	Cf2-3	Primates	Plesiadapiformes	Plesiadapidae	Plesiadapis cookei	m1	3.67593	2.0487	1.86722	0.305114	0.186576	0.285697	0.785969	0.668517
UM 85995	Cf2-3	Primates	Plesiadapiformes	Plesiadapidae	Plesiadapis cookei	m1	3.43542	2.13238	1.69762	0.234433	0.244467	0.0301876	0.672097	0.560194
UM 95858	Cf2-3	Primates	Plesiadapiformes	Plesiadapidae	Plesiadapis cookei	m1	3.90312	1.61802	1.64615	0.362824	0.197761	0.137816	0.742867	0.573788
UM 98075	Cf2-3	Primates	Plesiadapiformes	Plesiadapidae	Plesiadapis cookei	m1	3.65152	2.16687	1.85428	0.269626	0.234634	0.0461928	0.743323	0.589768
UM 98094	Cf2-3	Primates	Plesiadapiformes	Plesiadapidae	Plesiadapis cookei	m2	3.74926	1.94398	2.03434	0.331723	0.193752	0.275636	0.74166	0.589767
UM 109907	Cf2-3	Primates	Plesiadapiformes	Plesiadapidae	Plesiadapis dubius	m2	3.87356	1.53102	1.33891	0.362004	0.270613	0.239734	0.797102	0.629329
UM 67244	Cf2-3	Primates	Plesiadapiformes	Plesiadapidae	Plesiadapis dubius	m2	3.81715	1.74331	1.55453	0.373485	0.173637	0.260475	0.779317	0.579355
UM 68357	Cf2-3	Primates	Plesiadapiformes	Plesiadapidae	Plesiadapis dubius	m2	4.03347	1.75418	1.48486	0.367318	0.266129	0.318109	0.787836	0.61002
UM 71332	Cf2-3	Primates	Plesiadapiformes	Plesiadapidae	Plesiadapis dubius	m2	3.99993	1.53009	1.13102	0.377367	0.22671	0.286236	0.793773	0.628649
UM 77562	Cf2-3	Primates	Plesiadapiformes	Plesiadapidae	Plesiadapis dubius	m2	3.84623	1.63387	1.7918	0.404398	0.18633	0.277377	0.720437	0.538123
UM 86546	Cf2-3	Primates	Plesiadapiformes	Plesiadapidae	Plesiadapis dubius	m1	3.01977	1.81313	1.9655	0.308694	0.124987	0.370644	0.788143	0.59671
UM 69871	Cf2-3	Rodentia		Paramyidae	Acritoparamys atavus	m2	3.3703	1.71474	1.62892	0.601894	0.16048	0.664013	0.699024	0.598089
UM 71173	Cf2-3	Rodentia		Paramyidae	Acritoparamys atavus	m2	2.95308	2.59433	2.75648	0.446365	0.190242	0.326289	0.611694	0.469442
UM 77705	Cf2-3	Rodentia		Paramyidae	Acritoparamys atavus	m1	3.1544	1.52296	1.56133	0.447393	0.157685	0.494607	0.701629	0.619288
UM 77716	Cf2-3	Rodentia		Paramyidae	Acritoparamys atavus	m1	2.97219	2.42174	2.3129	0.436117	0.156547	0.274283	0.57192	0.638113
UM 77752	Cf2-3	Rodentia		Paramyidae	Acritoparamys atavus	m2	2.86143	2.48268	2.51513	0.445552	0.166357	0.226382	0.573837	0.50923
UM 71177	Cf2-3	Rodentia		Paramyidae	Acritoparamys atwateri	m2	3.26459	1.56096	1.75553	0.525362	0.197031	0.282402	0.673566	0.561946
UM 77741	Cf2-3	Rodentia		Paramyidae	Acritoparamys atwateri	m1	2.84862	1.76712	1.61344	0.408118	0.185405	0.373066	0.693729	0.568506
UM 77755	Cf2-3	Rodentia		Paramyidae	Acritoparamys atwateri	m2	2.9273	1.69928	1.61084	0.502726	0.151363	0.214711	0.632989	0.561193
UM 77797	Cf2-3	Rodentia		Paramyidae	Acritoparamys sp.	m1	3.10757	1.68974	1.59151	0.528421	0.155353	0.356359	0.692199	0.632328
UM 85996	Cf2-3	Rodentia		Paramyidae	Acritoparamys sp.	m1	2.9986	1.998	2.11351	0.527667	0.153343	0.347939	0.631058	0.540721
UM 77719	Cf2-3	Rodentia		Paramyidae	Microparamys cheradius	mX	3.03663	2.32671	2.02972	0.56462	0.1799	0.310009	0.484746	0.475509
UM 73569	Cf2-3	Rodentia		Paramyidae	Paramys sp.	mX	2.99876	1.69322	1.5	0.410029	0.122341	0.254928	0.667615	0.588835
UM 65120	Cf2-3	Rodentia		Paramyidae	Paramys taurus	m2	3.13288	2.19354	2.2056	0.490618	0.0874375	0.321889	0.572704	0.546609
UM 77727	Cf2-3	Rodentia		Paramyidae	Paramys taurus	m2	3.13483	1.72638	1.59447	0.555438	0.133823	0.0528826	0.574077	0.553829
UM 77834	Cf2-3	Rodentia		Paramyidae	Paramys taurus	m2	3.43539	1.68173	1.47433	0.575229	0.169947	0.167756	0.672055	0.655708
UM 78877	Cf2-3	Rodentia		Paramyidae	Paramys taurus	m1	3.32719	1.63067	1.70068	0.541507	0.191808	0.345965	0.725099	0.680005
UM 77742	Cf2-3	Rodentia		Paramyidae	Reithroparamys sp.	m2	2.97433	1.90912	1.8668	0.553186	0.16691	0.331134	0.675327	0.679462
USGS 23821	Wa0	Apatotheria		Apatemyidae	Apatemys chardini	m2	3.29503	1.66931	2.49316	0.421012	0.042197	0.434004	0.736647	0.424538
UW 9571	Wa0	Apatotheria		Apatemyidae	Apatemys chardini	m2	3.50604	1.13388	2.41302	0.35745	0.177372	0.462218	0.831193	0.344353
USGS 26548	Wa0	Apatotheria		Apatemyidae	Apatemys sp.	m2	3.20075	1.40302	2.61185	0.37842	0.105736	0.47822	0.837871	0.342823
USGS 9038	Wa0	Apatotheria		Apatemyidae	Apatemys sp.	m2	2.94335	1.17949	2.31824	0.301733	0.137712	0.341899	0.802676	0.369978
UM 93381	Wa0	Didelphimorphia		Peradectidae	Mimoperadectes labrus	mX	3.26121	1.16912	1.78111	0.275194	0.158219	0.270506	0.99672	0.672797
USNM 533571	Wa0	Didelphimorphia		Peradectidae	Mimoperadectes labrus	m3	4.14596	1.05611	2.04999	0.313328	0.171468	0.66375	1.22933	0.649878
USNM 538265	Wa0	Didelphimorphia		Peradectidae	Mimoperadectes labrus	m1	3.21386	0.944589	1.85891	0.316019	0.0954681	0.733168	0.9817	0.579644
USNM 538266	Wa0	Didelphimorphia		Peradectidae	Mimoperadectes labrus	m2	3.29764	1.15542	1.99169	0.365075	0.0322051	0.644746	1.01191	0.667819
USNM 538314	Wa0	Didelphimorphia		Peradectidae	Mimoperadectes labrus	m3	3.26039	1.08922	1.75763	0.336153	0.140827	0.210657	1.03681	0.716456
USGS 2715-1	Wa0	Didelphimorphia		Peradectidae	Peradectes chesteri	mX	3.54026	1.04439	1.34097	0.384354	0.178783	0.632342	0.909632	0.601998
USGS 2715-2	Wa0	Didelphimorphia		Peradectidae	Peradectes chesteri	mX	2.92296	2.08763	2.67737	0.309449	0.098174	0.558568	0.974164	0.502155
USGS 2715-3	Wa0	Didelphimorphia		Peradectidae	Peradectes chesteri	mX	2.70917	1.79268	2.1195	0.25583	0.101316	0.586002	0.999048	0.547143
USGS 3932	Wa0	Didelphimorphia		Peradectidae	Peradectes chesteri	m2	3.16894	1.83362	2.34082	0.309603	0.140357	0.666797	1.04656	0.603402
UW 9605	Wa0	Didelphimorphia		Peradectidae	Peradectes chesteri	m2	3.23623	1.45877	2.17798	0.246368	0.131515	0.726473	1.03287	0.562589
USNM 493839	Wa0	Didelphimorphia		Peradectidae	Peradectes sp.	m3	2.77132	1.82469	2.21102	0.257896	0.121985	0.694166	0.881634	0.550781
USGS 2717-1	Wa0	Didelphimorphia		Peradectidae	Peratherium macgrewi	mX	3.73831	0.759777	1.50194	0.36144	0.115637	0.789221	1.10893	0.581983
USGS 2717-2	Wa0	Didelphimorphia		Peradectidae	Peratherium macgrewi	mX	3.72741	1.45571	2.48782	0.167193	0.0609575	0.762873	0.908867	0.32036
USGS 2717-3	Wa0	Didelphimorphia		Peradectidae	Peratherium macgrewi	mX	3.57518	1.05251	1.49984	0.449578	0.173756	0.336559	1.01335	0.637379
UW 9564	Wa0	Didelphimorphia		Peradectidae	Peratherium macgrewi	m2	3.17558	1.55387	1.73974	0.286032	0.209241	0.603319	0.815115	0.606132
USNM 527686	Wa0	Didelphimorphia		Peradectidae	Peratherium sp.	m1	2.92191	1.40481	2.27572	0.339843	0.105336	0.76059	0.947375	0.602251
USNM 533578	Wa0	Didelphodonta		Palaeoryctidae	Didelphodus sp.	m2	2.95014	1.24261	2.07719	0.247983	0.156268	0.793186	1.22346	0.59748
USNM 533580	Wa0	Didelphodonta		Palaeoryctidae	Didelphodus sp.	mX	2.99589	1.51865	2.91969	0.266302	0.138081	0.776718	1.20665	0.625566
USNM 540166	Wa0	Didelphodonta		Palaeoryctidae	Didelphodus sp.	mX	3.07895	1.55996	2.26145	0.244286	0.126711	0.833827	1.27852	0.600046
USGS 6275	Wa0	Leptictida		Leptictidae	Prodiacodon sp.	m1	3.33995	1.35425	1.60234	0.361299	0.163711	0.716268	1.08174	0.667391
USGS 8098	Wa0	Lipotyphla	Erinaceomorpha		Macrocranion sp.	mX	3.42866	1.49822	1.86951	0.396668	0.217021	0.535603	0.887245	0.66741
USGS 2729	Wa0	Lipotyphla	Erinaceomorpha		Talpavoides dartoni	m2	3.22816	1.51849	1.90037	0.274661	0.0439068	0.672559	0.968396	0.539699
UW 6999	Wa0	Lipotyphla	Erinaceomorpha		Talpavoides dartoni	m2	3.61433	1.45142	1.70769	0.347358	0.147906	0.68274	0.966539	0.712968
UW 9623	Wa0	Lipotyphla	Erinaceomorpha		Talpavoides dartoni	m2	3.41199	1.93641	1.98364	0.411429	0.172542	0.736308	0.996673	0.61814
UW 9624	Wa0	Lipotyphla	Erinaceomorpha		Talpavoides dartoni	m2	2.73757	1.76171	1.91169	0.311328	0.103768	0.647362	0.823362	0.557807
USGS 23815	Wa0	Lipotyphla	Soricomorpha	Nyctitheriidae	Incertae sedis	m1	2.56786	1.666	1.98118	0.302891	0.152395	0.608195	0.832897	0.506701
USGS 8879	Wa0	Lipotyphla	Soricomorpha	Nyctitheriidae	Incertae sedis	m2	3.46796	1.50389	1.65057	0.384509	0.220407	0.558036	0.900845	0.781027
USNM 539487	Wa0	Lipotyphla	Soricomorpha	Nyctitheriidae	Incertae sedis	m1	3.37381	1.78625	1.84687	0.37138	0.233546	0.629345	0.97871	0.681443
USGS 23805	Wa0	Lipotyphla	Soricomorpha	Nyctitheriidae	Plagioctenoides microlestes	m2	3.41074	1.40644	1.6682	0.364268	0.112443	0.673126	0.92655	0.620501
USNM 488363	Wa0	Lipotyphla	Soricomorpha	Nyctitheriidae	Plagioctenoides sp.	m2	2.58535	2.04932	2.51232	0.260666	0.0681249	0.620844	0.857261	0.502301
USGS 10507	Wa0	Primates	Euprimates	Adapidae	Cantius ralstoni	m2	3.81719	1.59922	1.77836	0.379466	0.200761	0.267784	0.791542	0.594104
USGS 13650	Wa0	Primates	Euprimates	Adapidae	Cantius ralstoni	m2	3.76564	1.73979	2.18875	0.382814	0.218996	0.277224	0.738441	0.623776
USGS 13746	Wa0	Primates	Euprimates	Adapidae	Cantius ralstoni	mX	3.72899	1.48643	2.01645	0.382451	0.139583	0.17618	0.768053	0.585928
USGS 16503	Wa0	Primates	Euprimates	Adapidae	Cantius ralstoni	m2	3.8642	1.57758	1.91673	0.386998	0.212239	0.2624	0.710963	0.506497
USGS 23705	Wa0	Primates	Euprimates	Adapidae	Cantius ralstoni	m2	3.67298	1.57319	2.3676	0.389231	0.185865	0.212938	0.659604	0.425882
USGS 23725	Wa0	Primates	Euprimates	Adapidae	Cantius ralstoni	m1	4.04196	1.5401	1.68508	0.336174	0.240557	0.395747	0.832389	0.681561
USGS 23727	Wa0	Primates	Euprimates	Adapidae	Cantius ralstoni	m2	3.917	1.53426	2.15973	0.41536	0.173427	0.140934	0.788275	0.514223
USGS 25850	Wa0	Primates	Euprimates	Adapidae	Cantius ralstoni	m1	3.90348	1.54789	2.00076	0.377704	0.187194	0.0913692	0.839306	0.584526
USGS 27210	Wa0	Primates	Euprimates	Adapidae	Cantius ralstoni	m2	3.946	1.87407	2.04873	0.427432	0.174246	0.309512	0.713116	0.594146
USGS 27977	Wa0	Primates	Euprimates	Adapidae	Cantius ralstoni	mX	3.88199	1.53129	1.61086	0.364032	0.224323	0.0930283	0.751502	0.647794
USGS 30218	Wa0	Primates	Euprimates	Adapidae	Cantius ralstoni	m2	3.6246	1.64183	1.67418	0.375916	0.137684	0.284684	0.564122	0.421722
USGS 4695	Wa0	Primates	Euprimates	Adapidae	Cantius ralstoni	m2	4.47125	1.40875	1.69825	0.427784	0.22213	0.155805	0.752716	0.6019
USGS 4709	Wa0	Primates	Euprimates	Adapidae	Cantius ralstoni	m2	3.46313	1.89235	2.25421	0.360256	0.165123	0.13222	0.735857	0.477604
USGS 8869	Wa0	Primates	Euprimates	Adapidae	Cantius ralstoni	m2	4.11849	1.58411	1.80941	0.433912	0.176603	0.369428	0.80476	0.584848
UM 101958	Wa0	Primates	Euprimates	Adapidae	Cantius torresi	m2	3.8736	1.53061	1.95054	0.33341	0.191124	0.376997	0.857473	0.635167
UM 87341	Wa0	Primates	Euprimates	Adapidae	Cantius torresi	m2	3.60795	2.15164	2.16238	0.378803	0.13884	0.0867626	0.686612	0.581822
UM 87852	Wa0	Primates	Euprimates	Adapidae	Cantius torresi	m2	3.15321	1.75049	2.29927	0.308771	0.126537	0.317122	0.736082	0.614812
UM 95305	Wa0	Primates	Euprimates	Adapidae	Cantius torresi	m2	4.41061	1.36993	1.97313	0.443278	0.217134	0.392337	0.962533	0.827916
USGS 38057	Wa0	Primates	Euprimates	Adapidae	Cantius trigonodus	m2	3.59502	1.75995	2.25158	0.419723	0.119354	0.188453	0.711091	0.483003
USGS 9035	Wa0	Primates	Euprimates	Adapidae	Cantius trigonodus	m2	3.66463	1.70019	1.83897	0.377624	0.198147	0.275726	0.686057	0.553804
USGS 12193	Wa0	Primates	Euprimates	Omomyidae	Teilhardina americana	m2	3.41707	1.71607	1.8887	0.335994	0.200034	0.298275	0.794605	0.567113
USGS 15406	Wa0	Primates	Euprimates	Omomyidae	Teilhardina americana	m2	3.53696	1.53174	1.93545	0.415662	0.167763	0.60675	0.840287	0.590942
USGS 2428	Wa0	Primates	Euprimates	Omomyidae	Teilhardina americana	m1	3.24842	1.44867	2.17076	0.35792	0.179381	0.255688	0.614716	0.463792
USGS 25324	Wa0	Primates	Euprimates	Omomyidae	Teilhardina americana	m2	3.62625	1.51407	2.18254	0.405053	0.229603	0.423294	0.828019	0.609828
USGS 3864	Wa0	Primates	Euprimates	Omomyidae	Teilhardina americana	m2	3.12163	1.4288	2.19324	0.426549	0.191545	0.588718	0.707422	0.522966
USGS 5991	Wa0	Primates	Euprimates	Omomyidae	Teilhardina americana	m1	3.30956	1.20158	1.63185	0.321751	0.220455	0.356154	0.879044	0.649111
USGS 7195	Wa0	Primates	Euprimates	Omomyidae	Teilhardina americana	m1	3.28498	1.79528	1.94506	0.305981	0.22663	0.314686	0.800086	0.643542
UW 6896	Wa0	Primates	Euprimates	Omomyidae	Teilhardina americana	m2	3.70591	1.4464	1.80766	0.412694	0.225631	0.386245	0.832196	0.643463
UW 7165	Wa0	Primates	Euprimates	Omomyidae	Teilhardina americana	m1	3.27858	2.00587	2.33301	0.331741	0.217336	0.354846	0.865744	0.664137
UM 99031	Wa0	Primates	Euprimates	Omomyidae	Teilhardina brandti	m2	3.89202	2.02	1.94387	0.448243	0.210248	0.321605	0.8313	0.587671
USNM 493913	Wa0	Primates	Euprimates	Omomyidae	Teilhardina brandti	m1	3.68129	1.30697	1.82436	0.376552	0.258055	0.341216	0.905988	0.661723
USNM 493914	Wa0	Primates	Euprimates	Omomyidae	Teilhardina brandti	m2	3.38602	1.8328	2.13346	0.407358	0.158927	0.605878	0.739226	0.569906
USNM 521795	Wa0	Primates	Euprimates	Omomyidae	Teilhardina brandti	m2	3.28033	1.87863	1.95895	0.373791	0.201722	0.524058	0.814294	0.606147
USNM 525543	Wa0	Primates	Euprimates	Omomyidae	Teilhardina brandti	m2	3.71853	1.25439	1.63793	0.389126	0.25789	0.425368	0.927697	0.663317
USNM 525546	Wa0	Primates	Euprimates	Omomyidae	Teilhardina brandti	m2	3.2524	1.99954	2.14584	0.332197	0.118474	0.356119	0.777259	0.554787
USNM 525622	Wa0	Primates	Euprimates	Omomyidae	Teilhardina brandti	m2	3.34163	1.33499	1.88989	0.339777	0.159379	0.62471	0.781778	0.525803
USNM 533505	Wa0	Primates	Euprimates	Omomyidae	Teilhardina brandti	m2	3.80151	1.30116	1.78459	0.403804	0.194215	0.356418	0.893659	0.648776
USNM 533554	Wa0	Primates	Euprimates	Omomyidae	Teilhardina brandti	m1	3.59764	1.58484	1.64241	0.361309	0.243016	0.779873	0.82538	0.653381
USNM 538082	Wa0	Primates	Euprimates	Omomyidae	Teilhardina brandti	m2	3.04928	2.61236	2.30859	0.346143	0.0675954	0.454096	0.748398	0.570009
USGS 25025	Wa0	Primates	Plesiadapiformes	Micromomyidae	Chalicomomys antelucanus	m2	5.63409	1.17515	2.15225	0.472285	0.203445	1.0375	0.856418	0.630496
USNM 540292	Wa0	Primates	Plesiadapiformes	Microsyopidae	Microsyops sp.	mX	3.89912	1.47548	2.16206	0.4161	0.283043	0.44227	0.901757	0.707252
USGS 10520	Wa0	Primates	Plesiadapiformes	Microsyopidae	Niptomomys doreenae	m2	3.30933	1.85713	2.08816	0.442084	0.162426	0.405737	0.579393	0.527932
USGS 25496	Wa0	Primates	Plesiadapiformes	Microsyopidae	Niptomomys doreenae	m2	3.71027	2.41021	2.44059	0.419173	0.180316	0.330513	0.603331	0.574225
USGS 26546	Wa0	Primates	Plesiadapiformes	Microsyopidae	Niptomomys doreenae	m2	3.66159	1.73227	1.99289	0.547729	0.214664	0.512558	0.583389	0.607358
USGS 3831	Wa0	Primates	Plesiadapiformes	Microsyopidae	Niptomomys doreenae	m2	3.60293	1.51809	2.1206	0.472818	0.131472	1.0162	0.557455	0.573239
USGS 8883	Wa0	Primates	Plesiadapiformes	Microsyopidae	Niptomomys doreenae	m2	3.7653	1.53145	1.82892	0.517808	0.243977	0.397605	0.784593	0.634573
USGS 8884	Wa0	Primates	Plesiadapiformes	Microsyopidae	Niptomomys doreenae	m2	4.1306	1.7964	1.9195	0.590571	0.271454	0.38958	0.658911	0.649244
USGS 8887	Wa0	Primates	Plesiadapiformes	Microsyopidae	Niptomomys doreenae	m2	3.48802	1.68382	2.02412	0.490664	0.161791	0.356837	0.534504	0.538317
USNM 538360	Wa0	Primates	Plesiadapiformes	Paromomyidae	Ignacius graybullianus	m2	5.00211	2.2598	2.54326	0.468454	0.173797	0.26076	0.793593	0.469115
UW 7116	Wa0	Primates	Plesiadapiformes	Paromomyidae	Ignacius graybullianus	m2	4.19062	1.88706	2.37224	0.536488	0.166022	0.319423	0.698868	0.502385
USGS 27394	Wa0	Primates	Plesiadapiformes	Paromomyidae	Phenacolemur praecox	m1	4.21229	1.90299	2.00896	0.415806	0.228407	0.384238	0.705475	0.469116
USGS 9016	Wa0	Primates	Plesiadapiformes	Paromomyidae	Phenacolemur praecox	m1	4.2438	1.54734	1.7107	0.446476	0.225446	0.377683	0.746117	0.586098
USGS 25323	Wa0	Primates	Plesiadapiformes	Paromomyidae	Phenacolemur simonsi	m2	4.30862	1.39788	1.78377	0.469092	0.27004	0.350674	0.635396	0.521788
USNM 540232	Wa0	Primates	Plesiadapiformes	Paromomyidae	Phenacolemur simonsi	m2	4.32726	1.94738	2.14587	0.46216	0.200645	0.516024	0.681622	0.484359
USNM 540625	Wa0	Rodentia		Cylindrodontidae	Tuscahomys sp.	mX	2.89593	1.58631	1.83499	0.445021	0.126862	0.316304	0.644693	0.612702
USNM 540626	Wa0	Rodentia		Cylindrodontidae	Tuscahomys sp.	m2	2.99786	2.32907	2.34657	0.427342	0.201664	0.374806	0.841555	0.551801
USNM 540627	Wa0	Rodentia		Cylindrodontidae	Tuscahomys sp.	mX	2.82061	2.61442	2.46328	0.353099	0.1253	0.25287	0.627635	0.57392
USNM 541961	Wa0	Rodentia		Cylindrodontidae	Tuscahomys sp.	m2	3.14656	1.92682	1.68452	0.473591	0.128057	0.27374	0.630945	0.493773
UM 82383	Wa0	Rodentia		Paramyidae	Acritoparamys atwateri	m1	3.26773	1.86548	1.90632	0.607048	0.144523	0.354796	0.636793	0.570659
UM 86564	Wa0	Rodentia		Paramyidae	Acritoparamys atwateri	m2	2.93379	1.72665	1.88104	0.494296	0.113927	0.280387	0.618561	0.557358
USGS 8873	Wa0	Rodentia		Paramyidae	Acritoparamys francesi	m1	3.21223	2.16924	1.48197	0.481179	0.20282	0.362768	0.719401	0.623303
UM 99626	Wa0	Rodentia		Paramyidae	Incertae sedis	m2	3.23294	1.60955	1.90802	0.478295	0.143727	0.257454	0.773813	0.654556
USNM 488360	Wa0	Rodentia		Paramyidae	Microparamys wilsoni	m2	3.242	1.6429	1.49001	0.543663	0.158621	0.867921	0.51122	0.49253
USNM 525634	Wa0	Rodentia		Paramyidae	Paramys taurus	m2	3.5894	1.61464	1.61153	0.635734	0.15379	0.289431	0.802588	0.655856
USNM 540591	Wa0	Rodentia		Paramyidae	Paramys taurus	mX	3.45734	1.74516	1.47762	0.58721	0.153097	0.359008	0.61495	0.521468
UM 114570	Wa0	Rodentia		Paramyidae	Reithroparamys sp.	m1	3.00946	2.43681	2.43405	0.466981	0.137541	0.358026	0.653429	0.565344
USNM 525635	Wa0	Rodentia		Paramyidae	Reithroparamys sp.	m2	2.96753	2.65577	2.2691	0.481942	0.186342	0.253373	0.507491	0.446041
USNM 533551	Wa0	Rodentia			Incertae sedis	m2	2.89885	1.71786	1.71813	0.433444	0.187762	0.261342	0.677478	0.527588
UM 76834	Wa1-2	Apatotheria		Apatemyidae	Apatemys chardini	m2	3.18349	1.43599	2.41649	0.470919	0.0996245	0.320923	0.796158	0.45488
UW 8999	Wa1-2	Apatotheria		Apatemyidae	Apatemys kayi	m1	3.48942	1.276	2.41804	0.428354	0.246243	0.486386	0.888878	0.514311
USGS 9614	Wa1-2	Apatotheria		Apatemyidae	Apatemys sp.	m1	3.05527	1.44743	2.55385	0.357414	0.159721	0.400211	0.699063	0.43851
USGS 9742	Wa1-2	Apatotheria		Apatemyidae	Apatemys sp.	m1	3.26202	1.28239	2.20267	0.466085	0.16318	0.532215	0.93852	0.47624
UM 77399	Wa1-2	Apatotheria		Apatemyidae	Labidolemur kayi	m2	3.33888	1.09539	2.45003	0.37918	0.112943	0.528772	0.905205	0.494185
UM 81465	Wa1-2	Apatotheria		Apatemyidae	Labidolemur kayi	m1	3.17774	1.40687	2.69853	0.310273	0.122573	0.412516	0.812837	0.421066
UM 81474	Wa1-2	Apatotheria		Apatemyidae	Labidolemur kayi	m1	2.77867	2.34708	2.4611	0.355748	0.189957	0.156619	0.771953	0.641238
UM 81567	Wa1-2	Apatotheria		Apatemyidae	Labidolemur kayi	m2	3.38482	0.957757	2.52944	0.346456	0.0660602	0.288844	0.887742	0.460752
UM 82152	Wa1-2	Apatotheria		Apatemyidae	Labidolemur kayi	m2	2.91267	1.44885	2.51083	0.355923	0.081801	0.72872	0.869726	0.357204
UM 69979	Wa1-2	Apatotheria		Apatemyidae	Labidolemur serus	m2	3.18023	1.19411	2.51738	0.373326	0.109529	0.390778	0.821905	0.441384
UM 68867	Wa1-2	Didelphimorphia		Peradectidae	Peradectes chesteri	mX	3.36742	0.874839	1.83411	0.294509	0.177229	0.64035	1.1158	0.610075
USGS 2530	Wa1-2	Didelphimorphia		Peradectidae	Peradectes chesteri	mX	3.41212	0.901689	2.01892	0.334842	0.0963799	0.43661	1.03729	0.555151
USGS 2569-1	Wa1-2	Didelphimorphia		Peradectidae	Peradectes chesteri	mX	3.30419	0.861075	1.5276	0.317713	0.162648	0.644546	0.99102	0.502154
USGS 2569-2	Wa1-2	Didelphimorphia		Peradectidae	Peradectes chesteri	mX	3.36754	1.00287	1.57489	0.353631	0.161438	0.886391	1.07169	0.553007
USGS 2885	Wa1-2	Didelphimorphia		Peradectidae	Peradectes chesteri	mX	3.80993	1.10921	1.53185	0.346675	0.188758	0.15983	1.13272	0.630831
UM 75143	Wa1-2	Didelphimorphia		Peradectidae	Peradectes sp.	mX	3.63925	1.0014	1.45155	0.30414	0.162527	1.04527	1.14334	0.629609
UM 81573	Wa1-2	Didelphimorphia		Peradectidae	Peradectes sp.	mX	3.60571	1.04076	1.23218	0.334197	0.156764	0.735991	1.01603	0.651573
UM 95353	Wa1-2	Didelphimorphia		Peradectidae	Peradectes sp.	mX	3.65253	1.02989	1.38945	0.330498	0.18924	1.17519	1.00415	0.594315
UM 95384	Wa1-2	Didelphimorphia		Peradectidae	Peradectes sp.	mX	3.75955	0.934077	1.34079	0.374778	0.227123	0.485306	0.949343	0.666986
UM 66988	Wa1-2	Didelphodonta		Palaeoryctidae	Didelphodus absarokae	m2	2.87499	1.53649	2.52031	0.222305	0.111088	0.761422	1.20303	0.515995
UM 69850	Wa1-2	Didelphodonta		Palaeoryctidae	Didelphodus sp.	mX	2.4186	1.77526	2.47853	0.218618	0.127904	0.663367	1.05352	0.551784
USGS 9617	Wa1-2	Didelphodonta		Palaeoryctidae	Didelphodus sp.	mX	3.03182	1.70545	2.53066	0.255968	0.121047	0.657158	1.11973	0.563234
USGS 9652	Wa1-2	Didelphodonta		Palaeoryctidae	Didelphodus sp.	mX	3.195	1.42756	2.60542	0.198512	0.171115	0.715122	1.24541	0.546356
UM 81544	Wa1-2	Didelphodonta		Palaeoryctidae	Eoryctes melanus	mX	3.07019	1.48194	2.63383	0.251007	0.112479	0.44965	1.33137	0.364259
UM 81555	Wa1-2	Didelphodonta		Palaeoryctidae	Eoryctes melanus	mX	3.43148	1.74407	2.14994	0.33527	0.308279	0.347666	1.2705	0.371971
UM 79657	Wa1-2	Didelphodonta		Palaeoryctidae	Paleoryctes taurus	m2	3.5803	1.23906	2.73955	0.357244	0.0787216	1.31817	1.72977	0.342921
UM 80036	Wa1-2	Leptictida		Leptictidae	Palaeictops sp.	m2	3.22817	1.44885	1.96222	0.337673	0.166097	0.686739	1.12124	0.638369
UM 80508	Wa1-2	Leptictida		Leptictidae	Palaeictops sp.	m2	3.48386	1.22549	1.70561	0.393817	0.165108	0.785671	1.19185	0.725001
USGS 9311	Wa1-2	Leptictida		Leptictidae	Prodiacodon sp.	m1	3.11845	1.52462	1.87162	0.284644	0.129349	0.75422	1.12591	0.625244
USGS 9743	Wa1-2	Leptictida		Leptictidae	Prodiacodon sp.	m2	3.54272	1.47378	1.84354	0.320404	0.147328	0.755275	1.25089	0.679544
USGS 2566	Wa1-2	Leptictida		Leptictidae	Prodiacodon tauricinerei	mX	3.64595	1.40893	1.86086	0.37996	0.148868	0.80143	1.29639	0.730499
UM 71133	Wa1-2	Lipotyphla	Erinaceomorpha		Leipsanolestes siegfriedti	m2	2.72552	1.75663	2.17271	0.294985	0.17619	0.422085	0.737707	0.526326
UW 9568	Wa1-2	Lipotyphla	Erinaceomorpha		Leipsanolestes siegfriedti	m2	3.25165	1.50175	2.64044	0.358622	0.173049	0.513177	0.893487	0.710532
UM 69475	Wa1-2	Lipotyphla	Erinaceomorpha		Leipsanolestes sp.	m2	3.61396	1.28408	1.87019	0.401875	0.127353	0.776822	1.11053	0.657824
UW 9672	Wa1-2	Lipotyphla	Erinaceomorpha		Leipsanolestes sp.	mX	3.39861	1.40254	1.93266	0.297858	0.136314	0.566626	0.827171	0.495632
UW 9640	Wa1-2	Lipotyphla	Erinaceomorpha		Macrocranion nitens	mX	3.28699	1.68849	1.9348	0.336218	0.208716	0.49089	0.802784	0.636148
UW 8998	Wa1-2	Lipotyphla	Erinaceomorpha		Scenopagus hewettensis	m1	3.5112	1.39177	2.38375	0.336317	0.234642	0.682616	1.0741	0.633817
UM 72269	Wa1-2	Lipotyphla	Erinaceomorpha		Talpavus sp.	m1	3.04952	1.49175	1.75082	0.35376	0.17399	0.663521	0.974677	0.562106
UM 95390	Wa1-2	Lipotyphla	Soricomorpha	Nyctitheriidae	Incertae sedis	m1	3.02665	1.45319	1.46298	0.340928	0.0883345	0.696944	0.853115	0.65359
USGS 2531	Wa1-2	Lipotyphla	Soricomorpha	Nyctitheriidae	Incertae sedis	mX	3.40232	1.23035	1.5599	0.350333	0.216426	0.660158	1.03437	0.795875
UM 98356	Wa1-2	Lipotyphla	Soricomorpha	Nyctitheriidae	Leptacodon sp.	m1	2.50161	1.50012	2.26546	0.294443	0.0675395	0.706131	0.883651	0.478356
UM 75227	Wa1-2	Lipotyphla	Soricomorpha	Nyctitheriidae	Plagioctenodon krausae	m2	4.21363	1.41666	1.7685	0.367851	0.133357	0.606413	0.927716	0.623657
UM 82203	Wa1-2	Lipotyphla	Soricomorpha	Nyctitheriidae	Plagioctenodon krausae	m2	3.3025	1.64959	1.68135	0.393577	0.163777	0.720286	1.00556	0.665746
USGS 2563	Wa1-2	Lipotyphla	Soricomorpha	Nyctitheriidae	Plagioctenodon krausae	m2	3.34679	1.33744	2.07788	0.365132	0.105798	0.781641	0.972031	0.592096
USGS 2574	Wa1-2	Lipotyphla	Soricomorpha	Nyctitheriidae	Plagioctenodon krausae	mX	3.26702	1.93126	2.24406	0.383689	0.0997613	0.630319	0.833692	0.546178
USGS 17626	Wa1-2	Lipotyphla	Soricomorpha	Nyctitheriidae	Plagioctenodon sp.	m2	3.21342	1.79451	2.54783	0.356617	0.0679558	0.78962	0.947133	0.510646
USGS 2573	Wa1-2	Lipotyphla	Soricomorpha	Nyctitheriidae	Plagioctenoides microlestes	mX	3.03963	1.39716	2.50299	0.367282	0.130956	0.652221	0.931698	0.564308
UM 80615	Wa1-2	Lipotyphla	Soricomorpha	Nyctitheriidae	Wyonycteris sp.	m2	3.30545	1.8259	2.29043	0.32469	0.0811266	0.495268	0.815134	0.590145
UM 95373	Wa1-2	Lipotyphla	Soricomorpha	Nyctitheriidae	Wyonycteris sp.	m1	3.32368	1.62444	2.45204	0.372622	0.201849	0.772944	1.04235	0.605011
UM 95387	Wa1-2	Lipotyphla			Incertae sedis	m2	3.04629	1.67725	1.82421	0.291047	0.162011	0.509524	0.759006	0.592394
UM 102566	Wa1-2	Lipotyphla			Incertae sedis	m1	2.96053	1.24484	1.86384	0.229021	0.136063	0.684443	1.03674	0.616963
UM 81466	Wa1-2	Lipotyphla			Incertae sedis	mX	3.26204	1.16919	1.738	0.313789	0.168814	0.79128	1.11118	0.607969
UM 81595	Wa1-2	Lipotyphla			Incertae sedis	m2	3.50318	1.45096	1.49491	0.408394	0.114243	0.627543	0.922514	0.671585
UM 81598	Wa1-2	Lipotyphla			Incertae sedis	mX	3.42883	1.48288	2.09388	0.35691	0.245551	0.724692	1.02794	0.55458
UM 81602	Wa1-2	Lipotyphla			Incertae sedis	mX	3.36042	1.75702	2.13879	0.389625	0.148674	0.678955	0.954213	0.610923
UM 81604	Wa1-2	Lipotyphla			Incertae sedis	m1	3.24315	1.50739	2.19984	0.375629	0.190438	0.531918	0.866266	0.604182
UM 67497	Wa1-2	Primates	Euprimates	Adapidae	Cantius mckennai	m2	4.14295	1.46213	1.60021	0.440666	0.227115	0.328535	0.859752	0.68815
UM 67513	Wa1-2	Primates	Euprimates	Adapidae	Cantius mckennai	m1	4.47619	1.24141	1.69998	0.338531	0.260191	0.358666	0.881158	0.637303
UM 68313	Wa1-2	Primates	Euprimates	Adapidae	Cantius mckennai	m2	4.19473	1.38042	1.69594	0.435787	0.248766	0.205035	0.814823	0.646414
UM 69982	Wa1-2	Primates	Euprimates	Adapidae	Cantius mckennai	m2	3.8811	1.62581	2.04586	0.366905	0.197225	0.211193	0.772046	0.557718
UM 76250	Wa1-2	Primates	Euprimates	Adapidae	Cantius mckennai	m2	3.7762	1.53662	1.49038	0.40854	0.196833	0.292245	0.743421	0.60787
UM 76364	Wa1-2	Primates	Euprimates	Adapidae	Cantius mckennai	m2	3.93331	1.53997	1.71313	0.4001	0.260416	0.300367	0.837011	0.624371
UM 78929	Wa1-2	Primates	Euprimates	Adapidae	Cantius mckennai	m2	3.76296	1.43435	1.98832	0.352016	0.207454	0.378459	0.836375	0.612341
UM 80029	Wa1-2	Primates	Euprimates	Adapidae	Cantius mckennai	m1	4.18632	1.49993	1.99696	0.395017	0.203332	0.160266	0.852227	0.611772
UM 80477	Wa1-2	Primates	Euprimates	Adapidae	Cantius mckennai	m1	3.71084	1.71059	2.22584	0.275987	0.219315	0.241746	0.783562	0.589975
UM 80482	Wa1-2	Primates	Euprimates	Adapidae	Cantius mckennai	m2	3.76442	1.63852	1.92212	0.426141	0.197634	0.281363	0.779326	0.628839
UM 80484	Wa1-2	Primates	Euprimates	Adapidae	Cantius mckennai	m1	3.77524	1.37859	2.01588	0.314854	0.238311	0.280807	0.894739	0.602007
UM 80835	Wa1-2	Primates	Euprimates	Adapidae	Cantius mckennai	m2	4.26256	1.335	1.58707	0.388112	0.246282	0.145819	0.79213	0.597733
UM 81934	Wa1-2	Primates	Euprimates	Adapidae	Cantius mckennai	m2	3.92803	1.80713	1.8585	0.414209	0.157944	0.177897	0.698552	0.547912
UM 82208	Wa1-2	Primates	Euprimates	Adapidae	Cantius mckennai	m2	4.04088	1.5399	1.68045	0.357522	0.269463	0.12096	0.786342	0.679655
UM 99041	Wa1-2	Primates	Euprimates	Adapidae	Cantius mckennai	m2	3.67775	1.77041	2.05771	0.364691	0.19732	0.0959885	0.757571	0.577808
UM 64891	Wa1-2	Primates	Euprimates	Adapidae	Cantius ralsonti	m2	3.99268	1.30287	2.00762	0.437086	0.22341	0.375596	0.810854	0.609747
UM 115572	Wa1-2	Primates	Euprimates	Adapidae	Cantius ralstoni	m1	4.39384	1.35627	1.69438	0.350022	0.249813	0.237833	0.818408	0.609105
UM 64613	Wa1-2	Primates	Euprimates	Adapidae	Cantius ralstoni	m2	3.57238	1.71915	2.21828	0.353772	0.187198	0.324276	0.79449	0.566273
UM 64689	Wa1-2	Primates	Euprimates	Adapidae	Cantius ralstoni	m2	4.04581	1.52703	1.97134	0.413179	0.210856	0.168618	0.811057	0.572062
UM 64699	Wa1-2	Primates	Euprimates	Adapidae	Cantius ralstoni	m2	3.58215	1.96142	1.96539	0.304275	0.191975	0.295974	0.814795	0.589126
UM 64703	Wa1-2	Primates	Euprimates	Adapidae	Cantius ralstoni	m2	3.53779	2.33024	2.59794	0.366178	0.160709	0.288933	0.776222	0.532703
UM 64822	Wa1-2	Primates	Euprimates	Adapidae	Cantius ralstoni	m2	3.85829	1.50181	1.94782	0.406691	0.159277	0.297862	0.843231	0.63295
UM 64964	Wa1-2	Primates	Euprimates	Adapidae	Cantius ralstoni	m2	3.62988	1.72039	2.16292	0.369234	0.17935	0.372252	0.732549	0.623942
UM 64988	Wa1-2	Primates	Euprimates	Adapidae	Cantius ralstoni	m2	4.08557	1.23295	1.81575	0.381211	0.193311	0.336094	0.802647	0.604958
UM 65324	Wa1-2	Primates	Euprimates	Adapidae	Cantius ralstoni	m2	3.75613	1.9981	2.07097	0.386678	0.190633	0.143814	0.722511	0.59673
UM 68160	Wa1-2	Primates	Euprimates	Adapidae	Cantius ralstoni	m1	4.28288	1.1469	1.90485	0.355638	0.228038	0.164124	0.900804	0.620312
UM 69865	Wa1-2	Primates	Euprimates	Adapidae	Cantius ralstoni	m2	3.65058	1.47757	2.18477	0.336235	0.169445	0.18328	0.797938	0.588477
UM 75299	Wa1-2	Primates	Euprimates	Adapidae	Cantius ralstoni	m2	3.89431	1.42632	1.77791	0.376881	0.171661	0.244926	0.80756	0.617329
UM 75968	Wa1-2	Primates	Euprimates	Adapidae	Cantius ralstoni	m2	3.92617	1.40781	1.55669	0.422114	0.214053	0.0769493	0.775512	0.642462
UM 80169	Wa1-2	Primates	Euprimates	Adapidae	Cantius ralstoni	m2	4.02429	1.50078	1.74644	0.411117	0.232912	0.131651	0.880887	0.674352
USGS 13727	Wa1-2	Primates	Euprimates	Adapidae	Cantius trigonodus	m2	3.64958	2.40248	2.46223	0.390624	0.146065	0.252359	0.629182	0.425439
USGS 2558	Wa1-2	Primates	Euprimates	Adapidae	Cantius trigonodus	mX	3.56776	1.64391	2.14265	0.324152	0.208483	0.305264	0.798139	0.590288
USGS 8159	Wa1-2	Primates	Euprimates	Adapidae	Cantius trigonodus	mX	4.21314	1.4095	1.9861	0.352184	0.187594	0.273868	0.913657	0.770104
USGS 9024	Wa1-2	Primates	Euprimates	Adapidae	Cantius trigonodus	m2	3.87431	1.74244	2.03132	0.444901	0.188752	0.270527	0.676944	0.528902
USGS 9322	Wa1-2	Primates	Euprimates	Adapidae	Cantius trigonodus	mX	4.54086	1.5101	1.53648	0.39892	0.288936	0.199365	0.978534	0.763481
USGS 9599	Wa1-2	Primates	Euprimates	Adapidae	Cantius trigonodus	mX	3.69825	1.4625	1.96022	0.376512	0.15758	0.301288	0.781192	0.585803
USGS 9738	Wa1-2	Primates	Euprimates	Adapidae	Cantius trigonodus	mX	3.69645	1.86975	2.00336	0.432054	0.170536	0.26167	0.676697	0.615197
UM 69991	Wa1-2	Primates	Euprimates	Omomyidae	Anemorhysis sp.	m2	3.33187	1.74826	1.91176	0.386804	0.204746	0.577655	0.793587	0.614783
UM 71288	Wa1-2	Primates	Euprimates	Omomyidae	Anemorhysis sp.	m1	3.21004	2.04766	2.22564	0.368119	0.187276	0.240587	0.866964	0.725611
UM 76492	Wa1-2	Primates	Euprimates	Omomyidae	Anemorhysis sp.	m2	3.22011	1.76006	1.68863	0.315737	0.202152	0.684998	0.765304	0.628206
UM 79072	Wa1-2	Primates	Euprimates	Omomyidae	Anemorhysis sp.	m2	3.43374	1.6613	1.91263	0.369319	0.212479	0.106061	0.825	0.628136
UM 80836	Wa1-2	Primates	Euprimates	Omomyidae	Anemorhysis sp.	m1	3.07692	1.41575	1.82696	0.34644	0.212126	0.629445	0.90861	0.735196
UM 82209	Wa1-2	Primates	Euprimates	Omomyidae	Anemorhysis sp.	m1	3.22689	1.60361	1.87148	0.316849	0.226552	0.355435	0.840542	0.666249
UM 67424	Wa1-2	Primates	Euprimates	Omomyidae	Teilhardina americana	m2	3.589	1.52554	1.9453	0.381458	0.243739	0.598426	0.878727	0.667725
UM 72105	Wa1-2	Primates	Euprimates	Omomyidae	Teilhardina americana	m1	3.17265	1.49324	1.87396	0.290102	0.20706	0.361114	0.869784	0.69003
UM 72251	Wa1-2	Primates	Euprimates	Omomyidae	Teilhardina americana	m2	3.35657	1.87182	1.92171	0.369794	0.197119	0.402669	0.789873	0.53674
UM 76600	Wa1-2	Primates	Euprimates	Omomyidae	Teilhardina americana	m2	3.62896	1.49016	2.13229	0.334421	0.238726	0.450948	0.869096	0.614688
USGS 8819	Wa1-2	Primates	Euprimates	Omomyidae	Teilhardina americana-crassidens	m2	3.0936	1.88811	2.21114	0.338382	0.213302	0.226329	0.835283	0.587665
USGS 9156	Wa1-2	Primates	Euprimates	Omomyidae	Teilhardina americana-crassidens	m1	2.90311	2.21656	2.4609	0.292357	0.158639	0.341207	0.794626	0.677838
UM 71386	Wa1-2	Primates	Euprimates	Omomyidae	Teilhardina crassidens	m2	3.31503	1.84456	1.98673	0.364785	0.191573	0.521148	0.853724	0.577328
UM 71398	Wa1-2	Primates	Euprimates	Omomyidae	Teilhardina crassidens	m2	3.32842	1.92963	2.07642	0.346803	0.174829	0.289333	0.780466	0.58301
UM 83122	Wa1-2	Primates	Euprimates	Omomyidae	Tetonius matthewi	m2	3.48116	1.45843	1.65335	0.360726	0.197201	0.213439	0.834171	0.625384
USGS 9154	Wa1-2	Primates	Euprimates	Omomyidae	Tetonius matthewi	m2	3.56925	1.23301	1.78985	0.356201	0.202675	0.362684	0.811182	0.641738
USGS 9225	Wa1-2	Primates	Euprimates	Omomyidae	Tetonius matthewi	m2	3.58686	1.71475	1.89902	0.397565	0.174453	0.397443	0.836765	0.602928
UM 76501	Wa1-2	Primates	Euprimates	Omomyidae	Tetonius steini	m1	2.88338	1.67851	1.75185	0.264844	0.207037	0.330386	0.888232	0.727951
UM 83394	Wa1-2	Primates	Euprimates	Omomyidae	Tetonius steini	m2	3.46882	1.52514	1.76046	0.392968	0.20162	0.304542	0.809321	0.62162
UM 81485	Wa1-2	Primates	Euprimates	Omomyidae	Tetonoides tenuiculus	m1	3.65935	1.32685	1.71822	0.367446	0.251989	0.253965	1.07593	0.764401
USGS 366	Wa1-2	Primates	Plesiadapiformes	Micromomyidae	Tinomomys graybullianus	m2	3.55815	1.70336	2.2078	0.390053	0.241864	0.390566	0.890928	0.660763
UM 64809	Wa1-2	Primates	Plesiadapiformes	Microsyopidae	Arctodontomys wilsoni	m2	4.09732	1.28833	1.53122	0.443963	0.260152	0.571123	0.863478	0.744057
UM 67440	Wa1-2	Primates	Plesiadapiformes	Microsyopidae	Arctodontomys wilsoni	m2	5.19262	1.08585	1.82886	0.387133	0.247177	0.207953	0.867497	0.642723
UM 68598	Wa1-2	Primates	Plesiadapiformes	Microsyopidae	Arctodontomys wilsoni	m2	5.46383	1.15503	1.50706	0.323626	0.231753	0.295749	0.933761	0.729645
UM 74122	Wa1-2	Primates	Plesiadapiformes	Microsyopidae	Arctodontomys wilsoni	m2	4.47726	1.33587	1.66081	0.48224	0.277086	0.539396	0.869716	0.643765
UM 76617	Wa1-2	Primates	Plesiadapiformes	Microsyopidae	Arctodontomys wilsoni	m2	4.62699	1.11182	1.39894	0.527831	0.311168	0.271921	0.935761	0.763482
UM 82279	Wa1-2	Primates	Plesiadapiformes	Microsyopidae	Arctodontomys wilsoni	m2	3.72846	1.15316	1.56217	0.353389	0.197871	0.180784	0.781387	0.598639
UM 81476	Wa1-2	Primates	Plesiadapiformes	Microsyopidae	Niptomomys doreenae	m1	3.71241	1.3444	1.92533	0.441776	0.243793	0.724574	0.902278	0.695624
UM 81478	Wa1-2	Primates	Plesiadapiformes	Microsyopidae	Niptomomys doreenae	m1	3.93768	1.21631	1.76234	0.46072	0.208007	0.343875	0.766942	0.666469
UM 82190	Wa1-2	Primates	Plesiadapiformes	Microsyopidae	Niptomomys doreenae	m1	3.64782	1.4637	2.07201	0.475146	0.221753	0.645979	0.743033	0.67867
USGS 27867	Wa1-2	Primates	Plesiadapiformes	Microsyopidae	Niptomomys doreenae	m2	4.28107	1.75389	1.8315	0.632481	0.232106	1.03719	0.695956	0.637356
USGS 28475	Wa1-2	Primates	Plesiadapiformes	Microsyopidae	Niptomomys doreenae	m2	3.44141	1.29179	1.85743	0.45818	0.203358	0.945126	0.593861	0.600225
USGS 9306	Wa1-2	Primates	Plesiadapiformes	Microsyopidae	Niptomomys doreenae	m2	3.866	1.54476	2.00144	0.663217	0.168729	0.321877	0.596947	0.575714
USGS 9621	Wa1-2	Primates	Plesiadapiformes	Microsyopidae	Niptomomys doreenae	mX	3.63232	1.44901	1.87202	0.568283	0.195213	0.332917	0.632882	0.619018
UM 114794	Wa1-2	Primates	Plesiadapiformes	Paromomyidae	Ignacius graybullianus	m1	4.42678	1.53635	1.73449	0.476531	0.255688	0.474302	0.841374	0.661221
UM 83365	Wa1-2	Primates	Plesiadapiformes	Paromomyidae	Ignacius graybullianus	m2	5.151	2.28179	2.40716	0.464462	0.169185	0.22344	0.622351	0.471028
UM 86538	Wa1-2	Primates	Plesiadapiformes	Paromomyidae	Ignacius graybullianus	m1	3.80485	1.75388	2.10528	0.44938	0.137583	0.277218	0.629624	0.52988
USGS 25375-1	Wa1-2	Primates	Plesiadapiformes	Paromomyidae	Ignacius graybullianus	m1	3.63062	1.93198	2.44486	0.357911	0.146625	0.240672	0.57802	0.474227
USGS 25375-2	Wa1-2	Primates	Plesiadapiformes	Paromomyidae	Ignacius graybullianus	m1	4.07929	1.72455	2.08158	0.458097	0.19806	0.460676	0.654715	0.54692
USNM 493883	Wa1-2	Primates	Plesiadapiformes	Paromomyidae	Ignacius graybullianus	m2	3.79264	1.80573	2.27027	0.434307	0.227187	0.282706	0.74575	0.63667
UM 65773	Wa1-2	Primates	Plesiadapiformes	Paromomyidae	Phenacolemur praecox	m1	4.3481	1.77923	1.78896	0.507648	0.253145	0.358771	0.679148	0.536694
UM 68810	Wa1-2	Primates	Plesiadapiformes	Paromomyidae	Phenacolemur praecox	m2	4.38144	1.69884	1.71153	0.496181	0.220068	0.517355	0.728693	0.57535
UM 75313	Wa1-2	Primates	Plesiadapiformes	Paromomyidae	Phenacolemur praecox	m2	4.41227	1.66193	1.64323	0.499171	0.247196	0.50187	0.837012	0.710348
UM 75972	Wa1-2	Primates	Plesiadapiformes	Paromomyidae	Phenacolemur praecox	m2	4.41522	1.61802	1.8532	0.459695	0.263811	0.408827	0.692602	0.646331
USGS 25379	Wa1-2	Primates	Plesiadapiformes	Paromomyidae	Phenacolemur praecox	m2	4.47092	1.63136	1.73938	0.533766	0.274306	0.252645	0.78398	0.702732
USGS 28354	Wa1-2	Primates	Plesiadapiformes	Paromomyidae	Phenacolemur praecox	m2	4.28316	1.64255	1.70342	0.487018	0.236182	0.280209	0.702603	0.623087
USNM 521598	Wa1-2	Primates	Plesiadapiformes	Paromomyidae	Phenacolemur praecox	m2	4.09861	1.64883	1.85892	0.465315	0.226504	0.237167	0.78065	0.626591
UM 81492	Wa1-2	Primates	Plesiadapiformes	Paromomyidae	Phenacolemur simonsi	m2	4.45163	1.47984	1.99629	0.568281	0.256752	0.385494	0.644842	0.647644
UM 95364	Wa1-2	Primates	Plesiadapiformes	Paromomyidae	Phenacolemur simonsi	m1	4.40713	1.47899	1.79639	0.466886	0.233965	0.440247	0.820675	0.623432
USGS 25371	Wa1-2	Primates	Plesiadapiformes	Paromomyidae	Phenacolemur simonsi	m2	4.37504	1.73335	1.9933	0.48327	0.22491	0.321825	0.777126	0.545911
USGS 2560	Wa1-2	Primates	Plesiadapiformes	Paromomyidae	Phenacolemur simonsi	m2	4.2755	1.59902	2.02973	0.460358	0.294634	0.442713	0.776706	0.608212
USGS 9606	Wa1-2	Primates	Plesiadapiformes	Paromomyidae	Phenacolemur simonsi	m1	4.48604	1.2779	1.75898	0.4786	0.248054	0.299152	0.652774	0.560042
UM 111701	Wa1-2	Rodentia			Incertae sedis	mX	3.21546	1.47152	1.72803	0.507412	0.161065	0.192284	0.627069	0.530795
UM 72865	Wa1-2	Rodentia		Paramyidae	Acritoparamys atavus	m2	2.91398	2.23404	1.93681	0.510991	0.126376	0.325121	0.634112	0.655785
UM 76626	Wa1-2	Rodentia		Paramyidae	Acritoparamys atwateri	m1	3.12807	1.87314	2.01588	0.573567	0.194046	0.603083	0.603596	0.531277
UM 77515	Wa1-2	Rodentia		Paramyidae	Acritoparamys atwateri	m1	2.89389	1.84757	2.19706	0.411701	0.210023	0.294348	0.65259	0.565654
UM 77808	Wa1-2	Rodentia		Paramyidae	Acritoparamys atwateri	m2	2.92975	2.27235	1.95608	0.528531	0.149841	0.319828	0.562538	0.535098
UM 77810	Wa1-2	Rodentia		Paramyidae	Acritoparamys atwateri	m1	2.88029	2.21168	2.1698	0.421244	0.196361	0.316443	0.704631	0.523156
UM 77813	Wa1-2	Rodentia		Paramyidae	Acritoparamys atwateri	m2	2.81371	2.09645	2.35668	0.491529	0.0981179	0.116959	0.42059	0.420525
UM 77817	Wa1-2	Rodentia		Paramyidae	Acritoparamys atwateri	m1	3.25491	1.48317	1.65292	0.467713	0.246469	0.192131	0.709558	0.618872
UM 77827	Wa1-2	Rodentia		Paramyidae	Acritoparamys atwateri	m1	3.26597	2.23269	2.17489	0.568923	0.153979	0.348605	0.534776	0.520188
UM 72177	Wa1-2	Rodentia		Paramyidae	Acritoparamys pattersoni	m2	3.21608	2.07653	1.66845	0.601533	0.162182	0.154121	0.589161	0.545335
UM 77839	Wa1-2	Rodentia		Paramyidae	Acritoparamys pattersoni	m1	3.21395	1.60708	1.69809	0.524092	0.158702	0.323085	0.692842	0.58988
UM 110355	Wa1-2	Rodentia		Paramyidae	Acritoparamys sp.	m2	3.47621	1.78997	1.64353	0.626634	0.201757	0.313904	0.611869	0.560476
UM 46129	Wa1-2	Rodentia		Paramyidae	Acritoparamys sp.	mX	3.13057	1.70238	1.60428	0.459356	0.123172	0.397963	0.627789	0.552497
UM 75881	Wa1-2	Rodentia		Paramyidae	Acritoparamys sp.	m1	3.34577	2.30049	2.28179	0.651496	0.136469	0.383021	0.524665	0.51514
UM 77800	Wa1-2	Rodentia		Paramyidae	Acritoparamys sp.	m2	3.31243	1.56832	1.61855	0.554463	0.155401	0.411284	0.716968	0.596711
UM 82770	Wa1-2	Rodentia		Paramyidae	Acritoparamys sp.	m1	2.95287	1.77121	1.62907	0.442247	0.172583	0.306172	0.623801	0.549256
UM 85891	Wa1-2	Rodentia		Paramyidae	Acritoparamys sp.	m1	3.067	1.52221	1.59838	0.500451	0.158916	0.307392	0.729496	0.666482
UM 113261	Wa1-2	Rodentia		Paramyidae	Incertae sedis	m2	3.21546	1.51884	1.61321	0.503413	0.206779	0.32663	0.727046	0.569067
UM 98149	Wa1-2	Rodentia		Paramyidae	Incertae sedis	m1	3.26041	2.06121	1.78008	0.544682	0.169729	0.642378	0.706276	0.690403
UM 77785	Wa1-2	Rodentia		Paramyidae	Microparamys minutus	m2	3.13645	1.45589	1.5428	0.477764	0.175493	0.396386	0.69339	0.611922
UM 102476	Wa1-2	Rodentia		Paramyidae	Microparamys sp.	mX	3.0845	2.26473	1.8127	0.45071	0.154729	0.280483	0.6183	0.635214
UM 103102	Wa1-2	Rodentia		Paramyidae	Microparamys sp.	m1	2.9195	2.02733	1.75564	0.453827	0.150568	0.279007	0.637903	0.613775
UM 85624	Wa1-2	Rodentia		Paramyidae	Microparamys sp.	m1	3.29972	1.84675	1.61209	0.479992	0.168203	0.501824	0.57906	0.575424
UM 69821	Wa1-2	Rodentia		Paramyidae	Paramys excavatus	m1	3.02808	1.92839	1.8041	0.504781	0.175252	0.298615	0.606572	0.535323
USNM 525101	Wa1-2	Rodentia		Paramyidae	Paramys excavatus gardneri	m2	2.98942	1.89924	1.52909	0.409908	0.20599	0.168081	0.749837	0.614972
USNM 525104	Wa1-2	Rodentia		Paramyidae	Paramys excavatus gardneri	m2	3.60182	1.72901	1.96241	0.549427	0.193154	0.215364	0.614088	0.489304
UM 81618	Wa1-2	Rodentia		Paramyidae	Paramys sp.	m1	3.05841	1.82133	1.71751	0.472519	0.145477	0.362498	0.686243	0.568702
UM 82270	Wa1-2	Rodentia		Paramyidae	Paramys sp.	m1	3.01284	2.11576	2.02085	0.431602	0.153292	0.237944	0.606313	0.595096
UM 85884	Wa1-2	Rodentia		Paramyidae	Paramys sp.	m1	3.09131	1.59792	1.50941	0.479085	0.167958	0.146319	0.730475	0.662721
UM 65203	Wa1-2	Rodentia		Paramyidae	Paramys taurus	m2	3.02469	1.65112	1.73918	0.547073	0.221289	0.438535	0.699191	0.629938
UM 65275	Wa1-2	Rodentia		Paramyidae	Paramys taurus	m2	3.34296	1.81272	2.01216	0.421387	0.177792	0.306312	0.667198	0.515709
UM 76229	Wa1-2	Rodentia		Paramyidae	Paramys taurus	m2	3.33368	1.45501	1.49394	0.512105	0.193576	0.289041	0.597724	0.51078
UM 76575	Wa1-2	Rodentia		Paramyidae	Paramys taurus	m2	3.0922	1.84942	1.742	0.525345	0.139876	0.205779	0.603042	0.503886
UM 76839	Wa1-2	Rodentia		Paramyidae	Paramys taurus	m2	3.04317	2.31358	1.56544	0.440089	0.154124	0.26985	0.63557	0.639859
UM 77787	Wa1-2	Rodentia		Paramyidae	Paramys taurus	m2	3.3614	1.54306	1.7826	0.583733	0.113707	0.146443	0.758133	0.728986
UM 77823	Wa1-2	Rodentia		Paramyidae	Paramys taurus	m1	3.23115	1.74277	1.66925	0.50507	0.177223	0.25618	0.717987	0.563495
UM 77848	Wa1-2	Rodentia		Paramyidae	Paramys taurus	m2	3.30702	1.64167	1.6344	0.528336	0.14235	0.38142	0.686495	0.612987
UM 78889	Wa1-2	Rodentia		Sciuravidae	Knightomys cremneus	m1	3.13508	2.1287	1.59933	0.471949	0.156047	0.601904	0.598373	0.625229
1mX denotes either an m1, m2, or m3 (excluding the most distal molar).
2All angular data is shown in radians.
3In the case where more than five m2 specimens represented a genus, only five specimens (all m2s) for this genus were included; the exception to this were the euprimate taxa, as they were the focus of the study. In all other cases, m1 or mX specimens were used.
